# Supplementary material
Source: ML conference proceedings conference paper supplement (https://openreview.net/forum?id=4qRCiEZGKd)
Supplement: supplementary_material [file attachment]

## A APPENDIX

### A.1 DATASETS STATISTICS AND SYNTAX OF SROIQ CONCEPTS

Table 1: Detailed information about the datasets used for evaluation.

| Dataset        | Ind.   | Classes | Prop. | TBox | ABox    |
|----------------|--------|---------|-------|------|---------|
| Carcinogenesis | 22,372 | 142     | 4     | 144  | 74,223  |
| Mutagenesis    | 14,145 | 86      | 5     | 82   | 47,722  |
| Semantic Bible | 724    | 48      | 29    | 56   | 3,106   |
| Vicodi         | 33,238 | 194     | 10    | 204  | 116,181 |
| Family         | 202    | 18      | 4     | 26   | 472     |
| Father         | 6      | 4       | 1     | 3    | 4       |

### A.2 SECOND SET OF EXPERIMENTS: RETRIEVAL RESULTS IN A CLOSED WORD SCENARIO WITH INCOMPLETE DATASETS

Table 2: Retrieval performance on the *Father* dataset with different levels of incompleteness. # represents the number of expression types generated, **Jac** and **RT** represent the average Jaccard similarity and average runtime in seconds on every concept type.

| Ratio(%) | Concept Type            | #  | HermiT |       | Pellet |       | JFact |       | OpenIlet |       | EBR          |       |
|----------|-------------------------|----|--------|-------|--------|-------|-------|-------|----------|-------|--------------|-------|
|          |                         |    | Jac    | RT    | Jac    | RT    | Jac   | RT    | Jac      | RT    | Jac          | RT    |
| 0        | OWLClass                | 3  | 1.000  | 0.003 | 1.000  | 0.003 | 1.000 | 0.003 | 1.000    | 0.003 | 1.000        | 0.001 |
|          | OWLObjectAllValuesFrom  | 12 | 0.167  | 0.008 | 0.167  | 0.002 | 0.167 | 0.003 | 0.167    | 0.007 | <b>1.000</b> | 0.002 |
|          | OWLObjectComplementOf   | 3  | 1.000  | 0.019 | 1.000  | 0.002 | 1.000 | 0.003 | 1.000    | 0.002 | 1.000        | 0.001 |
|          | OWLObjectIntersectionOf | 36 | 1.000  | 0.032 | 0.889  | 0.006 | 1.000 | 0.005 | 0.889    | 0.003 | 1.000        | 0.001 |
|          | OWLObjectMaxCardinality | 36 | 0.167  | 0.007 | 0.167  | 0.003 | 0.167 | 0.006 | 0.167    | 0.003 | <b>1.000</b> | 0.001 |
|          | OWLObjectMinCardinality | 36 | 1.000  | 0.007 | 1.000  | 0.002 | 1.000 | 0.003 | 1.000    | 0.002 | 1.000        | 0.001 |
|          | OWLObjectSomeValuesFrom | 12 | 1.000  | 0.008 | 1.000  | 0.003 | 1.000 | 0.003 | 1.000    | 0.002 | 1.000        | 0.001 |
| 10       | OWLObjectUnionOf        | 36 | 1.000  | 0.004 | 1.000  | 0.004 | 1.000 | 0.004 | 1.000    | 0.006 | 1.000        | 0.001 |
|          | OWLClass                | 3  | 1.000  | 0.002 | 1.000  | 0.002 | 1.000 | 0.002 | 1.000    | 0.002 | 1.000        | 0.001 |
|          | OWLObjectAllValuesFrom  | 12 | 0.167  | 0.008 | 0.167  | 0.003 | 0.167 | 0.003 | 0.167    | 0.002 | <b>1.000</b> | 0.002 |
|          | OWLObjectComplementOf   | 3  | 1.000  | 0.003 | 1.000  | 0.002 | 1.000 | 0.002 | 1.000    | 0.002 | 1.000        | 0.001 |
|          | OWLObjectIntersectionOf | 36 | 1.000  | 0.008 | 0.889  | 0.009 | 1.000 | 0.003 | 0.889    | 0.002 | 1.000        | 0.001 |
|          | OWLObjectMaxCardinality | 36 | 0.167  | 0.004 | 0.167  | 0.004 | 0.167 | 0.003 | 0.167    | 0.002 | <b>1.000</b> | 0.001 |
|          | OWLObjectMinCardinality | 36 | 1.000  | 0.009 | 1.000  | 0.005 | 1.000 | 0.006 | 1.000    | 0.005 | 1.000        | 0.001 |
| 20       | OWLObjectSomeValuesFrom | 12 | 1.000  | 0.003 | 1.000  | 0.002 | 1.000 | 0.003 | 1.000    | 0.002 | 1.000        | 0.001 |
|          | OWLObjectUnionOf        | 36 | 1.000  | 0.037 | 1.000  | 0.005 | 1.000 | 0.005 | 1.000    | 0.003 | 1.000        | 0.001 |
|          | OWLClass                | 3  | 0.861  | 0.002 | 0.861  | 0.001 | 0.861 | 0.002 | 0.861    | 0.001 | 0.861        | 0.001 |
|          | OWLObjectAllValuesFrom  | 12 | 0.139  | 0.003 | 0.139  | 0.002 | 0.139 | 0.002 | 0.139    | 0.002 | <b>0.776</b> | 0.002 |
|          | OWLObjectComplementOf   | 3  | 0.917  | 0.003 | 0.917  | 0.002 | 0.917 | 0.002 | 0.917    | 0.002 | 0.917        | 0.001 |
|          | OWLObjectIntersectionOf | 36 | 0.940  | 0.010 | 0.845  | 0.002 | 0.940 | 0.005 | 0.845    | 0.005 | 0.940        | 0.001 |
|          | OWLObjectMaxCardinality | 36 | 0.139  | 0.015 | 0.139  | 0.010 | 0.139 | 0.003 | 0.139    | 0.002 | <b>0.838</b> | 0.001 |
| 40       | OWLObjectMinCardinality | 36 | 0.838  | 0.009 | 0.838  | 0.005 | 0.838 | 0.003 | 0.838    | 0.002 | 0.838        | 0.001 |
|          | OWLObjectSomeValuesFrom | 12 | 0.597  | 0.003 | 0.597  | 0.002 | 0.597 | 0.003 | 0.597    | 0.002 | 0.597        | 0.001 |
|          | OWLObjectUnionOf        | 36 | 0.856  | 0.030 | 0.856  | 0.005 | 0.856 | 0.006 | 0.856    | 0.003 | 0.856        | 0.001 |
|          | OWLClass                | 3  | 0.639  | 0.017 | 0.639  | 0.002 | 0.639 | 0.002 | 0.639    | 0.002 | 0.639        | 0.001 |
|          | OWLObjectAllValuesFrom  | 12 | 0.111  | 0.009 | 0.111  | 0.006 | 0.111 | 0.003 | 0.111    | 0.003 | <b>0.544</b> | 0.001 |
|          | OWLObjectComplementOf   | 3  | 0.750  | 0.003 | 0.750  | 0.002 | 0.750 | 0.002 | 0.750    | 0.002 | 0.750        | 0.001 |
|          | OWLObjectIntersectionOf | 36 | 0.824  | 0.030 | 0.774  | 0.008 | 0.824 | 0.004 | 0.774    | 0.002 | 0.824        | 0.001 |
| 80       | OWLObjectMaxCardinality | 36 | 0.111  | 0.007 | 0.111  | 0.003 | 0.111 | 0.003 | 0.111    | 0.003 | <b>0.670</b> | 0.001 |
|          | OWLObjectMinCardinality | 36 | 0.838  | 0.009 | 0.838  | 0.004 | 0.838 | 0.005 | 0.838    | 0.002 | 0.838        | 0.001 |
|          | OWLObjectSomeValuesFrom | 12 | 0.597  | 0.004 | 0.597  | 0.002 | 0.597 | 0.003 | 0.597    | 0.013 | 0.597        | 0.001 |
|          | OWLObjectUnionOf        | 36 | 0.657  | 0.004 | 0.657  | 0.002 | 0.657 | 0.003 | 0.657    | 0.005 | 0.657        | 0.001 |
|          | OWLClass                | 3  | 0.278  | 0.002 | 0.278  | 0.002 | 0.278 | 0.002 | 0.278    | 0.002 | <b>0.639</b> | 0.001 |
|          | OWLObjectAllValuesFrom  | 12 | 0.056  | 0.008 | 0.056  | 0.002 | 0.056 | 0.003 | 0.056    | 0.002 | <b>0.544</b> | 0.001 |
|          | OWLObjectComplementOf   | 3  | 0.500  | 0.002 | 0.500  | 0.002 | 0.500 | 0.002 | 0.500    | 0.002 | <b>0.750</b> | 0.001 |
|          | OWLObjectIntersectionOf | 36 | 0.648  | 0.030 | 0.648  | 0.006 | 0.648 | 0.004 | 0.648    | 0.002 | <b>0.824</b> | 0.001 |
|          | OWLObjectMaxCardinality | 36 | 0.056  | 0.005 | 0.056  | 0.002 | 0.056 | 0.003 | 0.056    | 0.002 | <b>0.670</b> | 0.001 |
|          | OWLObjectMinCardinality | 36 | 0.694  | 0.008 | 0.694  | 0.002 | 0.694 | 0.003 | 0.694    | 0.002 | <b>0.838</b> | 0.001 |
|          | OWLObjectSomeValuesFrom | 12 | 0.167  | 0.007 | 0.167  | 0.002 | 0.167 | 0.003 | 0.167    | 0.002 | <b>0.597</b> | 0.001 |
|          | OWLObjectUnionOf        | 36 | 0.315  | 0.006 | 0.315  | 0.003 | 0.315 | 0.003 | 0.315    | 0.005 | <b>0.657</b> | 0.001 |

Table 3: Retrieval performance on the *Family* dataset with different levels of incompleteness. # represents the number of expression types generated, **Jac** and **RT** represent the average Jaccard similarity and average runtime in seconds on every concept type

| Ratio(%) | Concept Type            | #    | HermiT |       | Pellet |       | JFact |       | Openllet |       | EBR          |       |
|----------|-------------------------|------|--------|-------|--------|-------|-------|-------|----------|-------|--------------|-------|
|          |                         |      | Jac    | RT    | Jac    | RT    | Jac   | RT    | Jac      | RT    | Jac          | RT    |
| 0        | OWLClass                | 18   | 1.000  | 0.013 | 1.000  | 0.018 | 1.000 | 0.023 | 1.000    | 0.011 | 1.000        | 0.008 |
|          | OWLObjectAllValuesFrom  | 288  | 0.000  | 0.408 | 0.000  | 0.013 | 0.000 | 0.021 | 0.000    | 0.013 | <b>1.000</b> | 0.151 |
|          | OWLObjectComplementOf   | 18   | 0.056  | 0.403 | 0.056  | 0.014 | 0.056 | 0.018 | 0.056    | 0.010 | <b>1.000</b> | 0.006 |
|          | OWLObjectIntersectionOf | 1296 | 0.387  | 0.231 | 0.387  | 0.014 | 0.387 | 0.021 | 0.387    | 0.013 | <b>1.000</b> | 0.013 |
|          | OWLObjectMaxCardinality | 864  | 0.000  | 0.409 | 0.000  | 0.013 | 0.000 | 0.022 | 0.000    | 0.012 | <b>1.000</b> | 0.079 |
|          | OWLObjectMinCardinality | 864  | 0.565  | 0.438 | 0.565  | 0.025 | 0.565 | 0.024 | 0.565    | 0.025 | <b>1.000</b> | 0.079 |
|          | OWLObjectSomeValuesFrom | 288  | 0.556  | 0.418 | 0.556  | 0.012 | 0.556 | 0.025 | 0.556    | 0.013 | <b>1.000</b> | 0.078 |
|          | OWLObjectUnionOf        | 1296 | 0.521  | 0.318 | 0.521  | 0.014 | 0.521 | 0.023 | 0.521    | 0.014 | <b>1.000</b> | 0.013 |
| 10       | OWLClass                | 18   | 0.931  | 0.012 | 0.931  | 0.019 | 0.931 | 0.014 | 0.931    | 0.014 | 0.931        | 0.006 |
|          | OWLObjectAllValuesFrom  | 288  | 0.000  | 0.344 | 0.000  | 0.012 | 0.000 | 0.019 | 0.000    | 0.012 | <b>0.849</b> | 0.132 |
|          | OWLObjectComplementOf   | 18   | 0.056  | 0.336 | 0.056  | 0.010 | 0.056 | 0.021 | 0.056    | 0.018 | <b>0.895</b> | 0.007 |
|          | OWLObjectIntersectionOf | 1296 | 0.378  | 0.196 | 0.378  | 0.012 | 0.378 | 0.021 | 0.378    | 0.012 | <b>0.933</b> | 0.013 |
|          | OWLObjectMaxCardinality | 864  | 0.000  | 0.346 | 0.000  | 0.013 | 0.000 | 0.019 | 0.000    | 0.012 | <b>0.896</b> | 0.069 |
|          | OWLObjectMinCardinality | 864  | 0.546  | 0.368 | 0.546  | 0.021 | 0.546 | 0.020 | 0.546    | 0.021 | <b>0.943</b> | 0.070 |
|          | OWLObjectSomeValuesFrom | 288  | 0.500  | 0.353 | 0.500  | 0.013 | 0.500 | 0.021 | 0.500    | 0.013 | <b>0.889</b> | 0.070 |
|          | OWLObjectUnionOf        | 1296 | 0.480  | 0.269 | 0.480  | 0.013 | 0.480 | 0.020 | 0.480    | 0.013 | <b>0.904</b> | 0.013 |
| 20       | OWLClass                | 18   | 0.826  | 0.010 | 0.826  | 0.012 | 0.826 | 0.012 | 0.826    | 0.008 | 0.826        | 0.006 |
|          | OWLObjectAllValuesFrom  | 288  | 0.000  | 0.262 | 0.000  | 0.010 | 0.000 | 0.014 | 0.000    | 0.011 | <b>0.729</b> | 0.110 |
|          | OWLObjectComplementOf   | 18   | 0.056  | 0.258 | 0.056  | 0.008 | 0.056 | 0.019 | 0.056    | 0.008 | <b>0.805</b> | 0.006 |
|          | OWLObjectIntersectionOf | 1296 | 0.360  | 0.149 | 0.360  | 0.010 | 0.360 | 0.015 | 0.360    | 0.010 | <b>0.854</b> | 0.012 |
|          | OWLObjectMaxCardinality | 864  | 0.000  | 0.267 | 0.000  | 0.011 | 0.000 | 0.015 | 0.000    | 0.009 | <b>0.794</b> | 0.058 |
|          | OWLObjectMinCardinality | 864  | 0.518  | 0.281 | 0.518  | 0.017 | 0.518 | 0.016 | 0.518    | 0.016 | <b>0.806</b> | 0.058 |
|          | OWLObjectSomeValuesFrom | 288  | 0.417  | 0.270 | 0.417  | 0.011 | 0.417 | 0.016 | 0.417    | 0.010 | <b>0.733</b> | 0.059 |
|          | OWLObjectUnionOf        | 1296 | 0.426  | 0.204 | 0.426  | 0.011 | 0.426 | 0.016 | 0.426    | 0.010 | <b>0.805</b> | 0.012 |
| 40       | OWLClass                | 18   | 0.613  | 0.012 | 0.613  | 0.006 | 0.613 | 0.014 | 0.613    | 0.006 | 0.613        | 0.005 |
|          | OWLObjectAllValuesFrom  | 288  | 0.000  | 0.135 | 0.000  | 0.007 | 0.000 | 0.011 | 0.000    | 0.007 | <b>0.528</b> | 0.072 |
|          | OWLObjectComplementOf   | 18   | 0.056  | 0.141 | 0.056  | 0.006 | 0.056 | 0.008 | 0.056    | 0.006 | <b>0.623</b> | 0.005 |
|          | OWLObjectIntersectionOf | 1296 | 0.316  | 0.080 | 0.316  | 0.008 | 0.316 | 0.012 | 0.316    | 0.007 | <b>0.687</b> | 0.010 |
|          | OWLObjectMaxCardinality | 864  | 0.000  | 0.136 | 0.000  | 0.009 | 0.000 | 0.011 | 0.000    | 0.008 | <b>0.595</b> | 0.039 |
|          | OWLObjectMinCardinality | 864  | 0.466  | 0.144 | 0.466  | 0.011 | 0.466 | 0.013 | 0.466    | 0.010 | <b>0.614</b> | 0.039 |
|          | OWLObjectSomeValuesFrom | 288  | 0.260  | 0.137 | 0.260  | 0.008 | 0.260 | 0.011 | 0.260    | 0.007 | <b>0.442</b> | 0.039 |
|          | OWLObjectUnionOf        | 1296 | 0.318  | 0.108 | 0.318  | 0.009 | 0.318 | 0.012 | 0.318    | 0.008 | <b>0.606</b> | 0.010 |
| 80       | OWLClass                | 18   | 0.210  | 0.003 | 0.210  | 0.003 | 0.210 | 0.004 | 0.210    | 0.003 | 0.210        | 0.003 |
|          | OWLObjectAllValuesFrom  | 288  | 0.000  | 0.027 | 0.000  | 0.004 | 0.000 | 0.006 | 0.000    | 0.003 | <b>0.173</b> | 0.020 |
|          | OWLObjectComplementOf   | 18   | 0.056  | 0.022 | 0.056  | 0.003 | 0.056 | 0.004 | 0.056    | 0.003 | <b>0.241</b> | 0.004 |
|          | OWLObjectIntersectionOf | 1296 | 0.239  | 0.017 | 0.239  | 0.003 | 0.239 | 0.006 | 0.239    | 0.003 | <b>0.361</b> | 0.007 |
|          | OWLObjectMaxCardinality | 864  | 0.000  | 0.030 | 0.000  | 0.005 | 0.000 | 0.005 | 0.000    | 0.003 | <b>0.202</b> | 0.012 |
|          | OWLObjectMinCardinality | 864  | 0.406  | 0.027 | 0.406  | 0.004 | 0.406 | 0.005 | 0.406    | 0.003 | <b>0.413</b> | 0.012 |
|          | OWLObjectSomeValuesFrom | 288  | 0.079  | 0.025 | 0.079  | 0.003 | 0.079 | 0.006 | 0.079    | 0.003 | <b>0.099</b> | 0.012 |
|          | OWLObjectUnionOf        | 1296 | 0.109  | 0.020 | 0.109  | 0.004 | 0.109 | 0.005 | 0.109    | 0.003 | <b>0.204</b> | 0.007 |

### A.3 THIRD SET OF EXPERIMENTS: RETRIEVAL RESULTS IN A CLOSED WORD SCENARIO WITH NOISY DATASETS

Table 4: Retrieval performance on the *Carcinogenesis* dataset with different levels of incompleteness. # represents the number of expression types generated, **Jac** and **RT** represent the average Jaccard similarity and average runtime in seconds on every concept type.

| Ratio(%) | Concept Type            | #  | HermiT       |          | Pellet       |       | JFact        |        | Openllet     |       | EBR          |       |
|----------|-------------------------|----|--------------|----------|--------------|-------|--------------|--------|--------------|-------|--------------|-------|
|          |                         |    | Jac          | RT       | Jac          | RT    | Jac          | RT     | Jac          | RT    | Jac          | RT    |
| 0        | OWLClass                | 2  | 1.000        | 1.249    | 1.000        | 1.132 | 1.000        | 49.928 | 1.000        | 1.105 | 1.000        | 0.815 |
|          | OWLObjectComplementOf   | 2  | 0.589        | 1052.861 | 0.589        | 1.506 | 0.589        | 50.418 | 0.589        | 1.417 | <b>1.000</b> | 0.763 |
|          | OWLObjectIntersectionOf | 16 | 0.647        | 866.197  | 0.647        | 1.343 | 0.647        | 49.561 | 0.647        | 1.254 | <b>1.000</b> | 1.634 |
|          | OWLObjectUnionOf        | 16 | 0.795        | 628.243  | 0.795        | 1.433 | 0.795        | 49.369 | 0.795        | 1.365 | <b>1.000</b> | 3.123 |
| 40       | OWLClass                | 5  | <b>0.359</b> | 0.234    | <b>0.359</b> | 0.220 | <b>0.359</b> | 4.966  | <b>0.359</b> | 0.235 | 0.352        | 0.292 |
|          | OWLObjectComplementOf   | 5  | 0.164        | 64.514   | 0.164        | 0.287 | 0.164        | 5.430  | 0.164        | 0.284 | <b>0.276</b> | 7.472 |
|          | OWLObjectIntersectionOf | 20 | 0.631        | 94.602   | 0.631        | 0.223 | 0.631        | 5.455  | 0.631        | 0.233 | <b>0.657</b> | 3.034 |
|          | OWLObjectUnionOf        | 20 | 0.269        | 16.343   | 0.269        | 0.311 | 0.269        | 5.321  | 0.269        | 0.306 | <b>0.295</b> | 0.633 |
| 60       | OWLClass                | 5  | <b>0.151</b> | 0.556    | <b>0.151</b> | 0.270 | <b>0.151</b> | 1.868  | <b>0.151</b> | 0.117 | 0.143        | 0.302 |
|          | OWLObjectComplementOf   | 5  | 0.079        | 19.983   | 0.079        | 0.115 | 0.079        | 1.829  | 0.079        | 0.152 | <b>0.132</b> | 4.718 |
|          | OWLObjectIntersectionOf | 20 | 0.558        | 29.184   | 0.558        | 0.125 | 0.558        | 1.823  | 0.558        | 0.101 | <b>0.569</b> | 3.867 |
|          | OWLObjectUnionOf        | 20 | 0.124        | 4.906    | 0.124        | 0.128 | 0.124        | 1.921  | 0.124        | 0.135 | <b>0.135</b> | 0.560 |
| 80       | OWLClass                | 4  | 0.119        | 0.086    | 0.119        | 0.076 | 0.119        | 0.966  | 0.119        | 0.094 | 0.119        | 0.205 |
|          | OWLObjectComplementOf   | 4  | 0.099        | 3.389    | 0.099        | 0.143 | 0.099        | 1.117  | 0.099        | 0.117 | <b>0.120</b> | 4.255 |
|          | OWLObjectIntersectionOf | 32 | <b>0.419</b> | 6.469    | <b>0.419</b> | 0.107 | <b>0.419</b> | 1.120  | <b>0.419</b> | 0.091 | 0.387        | 0.260 |
|          | OWLObjectUnionOf        | 32 | 0.111        | 2.227    | 0.111        | 0.117 | 0.111        | 1.081  | 0.111        | 0.135 | <b>0.121</b> | 0.791 |
| 90       | OWLClass                | 4  | <b>0.150</b> | 0.098    | <b>0.150</b> | 0.034 | <b>0.150</b> | 0.273  | <b>0.150</b> | 0.046 | 0.108        | 0.266 |
|          | OWLObjectComplementOf   | 4  | 0.039        | 1.335    | 0.039        | 0.047 | 0.039        | 0.329  | 0.039        | 0.047 | <b>0.055</b> | 0.282 |
|          | OWLObjectIntersectionOf | 32 | <b>0.439</b> | 2.602    | <b>0.439</b> | 0.045 | <b>0.439</b> | 0.342  | <b>0.439</b> | 0.049 | 0.377        | 0.479 |
|          | OWLObjectUnionOf        | 32 | 0.061        | 1.232    | 0.061        | 0.066 | 0.061        | 0.370  | 0.061        | 0.059 | <b>0.062</b> | 1.464 |

Table 5: Retrieval performance on the *Mutagenesis* dataset with different levels of incompleteness. # represents the number of expression types generated, **Jac** and **RT** represent the average Jaccard similarity and average runtime in seconds on every concept type.

| Ratio(%) | Concept Type            | #  | HermiT       |         | Pellet       |       | JFact        |        | Openllet     |       | EBR          |        |
|----------|-------------------------|----|--------------|---------|--------------|-------|--------------|--------|--------------|-------|--------------|--------|
|          |                         |    | Jac          | RT      | Jac          | RT    | Jac          | RT     | Jac          | RT    | Jac          | RT     |
| 0        | OWLClass                | 5  | 1.000        | 0.718   | 1.000        | 0.658 | 1.000        | 17.521 | 1.000        | 0.639 | 1.000        | 1.860  |
|          | OWLObjectComplementOf   | 5  | 0.000        | 781.758 | 0.000        | 0.694 | 0.000        | 19.605 | 0.000        | 0.669 | <b>0.909</b> | 10.422 |
|          | OWLObjectIntersectionOf | 20 | 0.750        | 585.475 | 0.750        | 0.690 | 0.750        | 18.018 | 0.750        | 0.658 | <b>0.977</b> | 6.568  |
|          | OWLObjectUnionOf        | 20 | 0.750        | 197.910 | 0.750        | 0.813 | 0.750        | 18.649 | 0.750        | 0.779 | <b>0.932</b> | 3.721  |
| 10       | OWLClass                | 5  | <b>0.915</b> | 0.465   | <b>0.915</b> | 0.455 | <b>0.915</b> | 10.002 | <b>0.915</b> | 0.456 | 0.914        | 0.368  |
|          | OWLObjectComplementOf   | 5  | 0.000        | 373.715 | 0.000        | 0.465 | 0.000        | 9.762  | 0.000        | 0.443 | <b>0.711</b> | 0.358  |
|          | OWLObjectIntersectionOf | 20 | 0.729        | 281.808 | 0.729        | 0.478 | 0.729        | 9.937  | 0.729        | 0.448 | <b>0.906</b> | 5.408  |
|          | OWLObjectUnionOf        | 20 | 0.597        | 94.854  | 0.597        | 0.567 | 0.597        | 9.756  | 0.597        | 0.563 | <b>0.762</b> | 0.814  |
| 20       | OWLClass                | 5  | <b>0.675</b> | 0.293   | <b>0.675</b> | 0.295 | <b>0.675</b> | 5.721  | <b>0.675</b> | 0.299 | 0.674        | 0.851  |
|          | OWLObjectComplementOf   | 5  | 0.000        | 170.452 | 0.000        | 0.275 | 0.000        | 5.795  | 0.000        | 0.279 | <b>0.507</b> | 4.132  |
|          | OWLObjectIntersectionOf | 20 | 0.669        | 127.305 | 0.669        | 0.320 | 0.669        | 5.769  | 0.669        | 0.301 | <b>0.795</b> | 4.937  |
|          | OWLObjectUnionOf        | 20 | 0.438        | 43.052  | 0.438        | 0.367 | 0.438        | 5.709  | 0.438        | 0.329 | <b>0.549</b> | 1.664  |
| 40       | OWLClass                | 5  | 0.667        | 0.153   | 0.667        | 0.162 | 0.667        | 2.068  | 0.667        | 0.122 | 0.667        | 0.353  |
|          | OWLObjectComplementOf   | 5  | 0.000        | 52.448  | 0.000        | 0.136 | 0.000        | 2.092  | 0.000        | 0.118 | <b>0.245</b> | 0.336  |
|          | OWLObjectIntersectionOf | 20 | 0.667        | 39.716  | 0.667        | 0.136 | 0.667        | 2.028  | 0.667        | 0.127 | <b>0.728</b> | 4.470  |
|          | OWLObjectUnionOf        | 20 | 0.305        | 13.320  | 0.305        | 0.202 | 0.305        | 2.110  | 0.305        | 0.173 | <b>0.351</b> | 0.734  |
| 80       | OWLClass                | 5  | 0.200        | 0.426   | 0.200        | 0.050 | 0.200        | 0.223  | 0.200        | 0.038 | 0.200        | 0.124  |
|          | OWLObjectComplementOf   | 5  | 0.000        | 3.332   | 0.000        | 0.127 | 0.000        | 0.243  | 0.000        | 0.046 | <b>0.050</b> | 0.643  |
|          | OWLObjectIntersectionOf | 20 | 0.550        | 2.267   | 0.550        | 0.039 | 0.550        | 0.223  | 0.550        | 0.039 | <b>0.563</b> | 1.663  |
|          | OWLObjectUnionOf        | 20 | 0.075        | 0.791   | 0.075        | 0.042 | 0.075        | 0.195  | 0.075        | 0.029 | <b>0.088</b> | 0.296  |

Table 6: Retrieval performance on the *Semantic Bible* dataset with different levels of incompleteness. # represents the number of expression types generated, **Jac** and **RT** represent the average Jaccard similarity and average runtime in seconds on every concept type.

| Ratio(%) | Concept Type            | #  | HermiT |        | Pellet |       | JFact |       | OpenIlet |       | EBR          |        |
|----------|-------------------------|----|--------|--------|--------|-------|-------|-------|----------|-------|--------------|--------|
|          |                         |    | Jac    | RT     | Jac    | RT    | Jac   | RT    | Jac      | RT    | Jac          | RT     |
| 0        | OWLClass                | 5  | 1.000  | 0.105  | 1.000  | 0.079 | 1.000 | 0.232 | 1.000    | 0.066 | 1.000        | 0.920  |
|          | OWLObjectComplementOf   | 5  | 0.027  | 19.699 | 0.027  | 0.061 | 0.027 | 0.201 | 0.027    | 0.065 | <b>0.903</b> | 2.533  |
|          | OWLObjectIntersectionOf | 20 | 0.757  | 14.462 | 0.757  | 0.066 | 0.757 | 0.191 | 0.757    | 0.055 | <b>0.976</b> | 3.641  |
|          | OWLObjectUnionOf        | 20 | 0.757  | 5.095  | 0.757  | 0.089 | 0.757 | 0.211 | 0.757    | 0.082 | <b>0.928</b> | 1.774  |
| 10       | OWLClass                | 5  | 0.768  | 0.074  | 0.768  | 0.054 | 0.768 | 0.135 | 0.768    | 0.056 | 0.768        | 5.040  |
|          | OWLObjectComplementOf   | 5  | 0.002  | 9.937  | 0.002  | 0.047 | 0.002 | 0.134 | 0.002    | 0.031 | <b>0.741</b> | 4.827  |
|          | OWLObjectIntersectionOf | 20 | 0.693  | 7.288  | 0.693  | 0.049 | 0.693 | 0.136 | 0.693    | 0.070 | <b>0.877</b> | 12.408 |
|          | OWLObjectUnionOf        | 20 | 0.562  | 2.740  | 0.562  | 0.074 | 0.562 | 0.149 | 0.562    | 0.073 | <b>0.747</b> | 9.971  |
| 20       | OWLClass                | 5  | 0.515  | 0.068  | 0.515  | 0.044 | 0.515 | 0.063 | 0.515    | 0.082 | 0.515        | 0.397  |
|          | OWLObjectComplementOf   | 5  | 0.001  | 5.461  | 0.001  | 0.024 | 0.001 | 0.057 | 0.001    | 0.024 | <b>0.540</b> | 3.687  |
|          | OWLObjectIntersectionOf | 20 | 0.629  | 3.926  | 0.629  | 0.042 | 0.629 | 0.095 | 0.629    | 0.041 | <b>0.764</b> | 2.173  |
|          | OWLObjectUnionOf        | 20 | 0.399  | 1.345  | 0.399  | 0.055 | 0.399 | 0.096 | 0.399    | 0.044 | <b>0.534</b> | 0.767  |
| 40       | OWLClass                | 5  | 0.337  | 0.072  | 0.337  | 0.018 | 0.337 | 0.049 | 0.337    | 0.018 | 0.337        | 0.528  |
|          | OWLObjectComplementOf   | 5  | 0.013  | 1.750  | 0.013  | 0.053 | 0.013 | 0.032 | 0.013    | 0.040 | <b>0.273</b> | 2.678  |
|          | OWLObjectIntersectionOf | 20 | 0.587  | 1.465  | 0.587  | 0.040 | 0.587 | 0.085 | 0.587    | 0.048 | <b>0.653</b> | 2.468  |
|          | OWLObjectUnionOf        | 20 | 0.226  | 0.471  | 0.226  | 0.030 | 0.226 | 0.057 | 0.226    | 0.020 | <b>0.291</b> | 1.093  |
| 80       | OWLClass                | 5  | 0.100  | 0.014  | 0.100  | 0.012 | 0.100 | 0.030 | 0.100    | 0.010 | 0.100        | 0.335  |
|          | OWLObjectComplementOf   | 5  | 0.000  | 0.200  | 0.000  | 0.011 | 0.000 | 0.022 | 0.000    | 0.012 | <b>0.051</b> | 0.329  |
|          | OWLObjectIntersectionOf | 20 | 0.525  | 0.153  | 0.525  | 0.034 | 0.525 | 0.028 | 0.525    | 0.028 | <b>0.538</b> | 1.462  |
|          | OWLObjectUnionOf        | 20 | 0.050  | 0.203  | 0.050  | 0.059 | 0.050 | 0.034 | 0.050    | 0.016 | <b>0.063</b> | 0.696  |

Table 7: Retrieval performance on the *Vicodi* dataset with different levels of incompleteness. # represents the number of expression types generated, **Jac** and **RT** represent the average Jaccard similarity and average runtime in seconds on every concept type.

| Ratio(%) | Concept Type            | #   | HermiT       |          | Pellet       |       | JFact        |         | OpenIlet     |       | EBR          |       |
|----------|-------------------------|-----|--------------|----------|--------------|-------|--------------|---------|--------------|-------|--------------|-------|
|          |                         |     | Jac          | RT       | Jac          | RT    | Jac          | RT      | Jac          | RT    | Jac          | RT    |
| 0        | OWLClass                | 3   | 1.000        | 3.028    | 1.000        | 1.460 | 1.000        | 125.599 | 1.000        | 1.386 | 1.000        | 0.204 |
|          | OWLObjectComplementOf   | 3   | 0.995        | 47.866   | 0.995        | 2.037 | 0.995        | 128.398 | 0.995        | 1.923 | <b>1.000</b> | 0.242 |
|          | OWLObjectIntersectionOf | 36  | 0.887        | 2224.491 | 0.887        | 1.577 | 0.887        | 127.387 | 0.887        | 1.564 | <b>1.000</b> | 0.899 |
|          | OWLObjectUnionOf        | 36  | 0.998        | 314.949  | 0.998        | 1.886 | 0.998        | 128.206 | 0.998        | 1.842 | <b>1.000</b> | 0.515 |
| 40       | OWLClass                | 1   | 0.333        | 0.881    | 0.333        | 0.507 | 0.333        | 14.781  | 0.333        | 0.436 | 0.333        | 0.380 |
|          | OWLObjectComplementOf   | 1   | 0.269        | 14.052   | 0.269        | 0.596 | 0.269        | 14.619  | 0.269        | 0.564 | <b>0.277</b> | 0.406 |
|          | OWLObjectIntersectionOf | 4   | 0.650        | 358.309  | 0.650        | 0.494 | 0.650        | 14.577  | 0.650        | 0.472 | <b>0.652</b> | 8.060 |
|          | OWLObjectUnionOf        | 4   | 0.289        | 4.500    | 0.289        | 0.583 | 0.289        | 14.734  | 0.289        | 0.541 | <b>0.291</b> | 2.733 |
| 60       | OWLClass                | 5   | <b>0.301</b> | 0.401    | <b>0.301</b> | 0.213 | <b>0.301</b> | 5.149   | <b>0.301</b> | 0.183 | 0.097        | 0.450 |
|          | OWLObjectComplementOf   | 5   | 0.128        | 2.358    | 0.128        | 0.379 | 0.128        | 5.147   | 0.128        | 0.297 | <b>0.131</b> | 0.553 |
|          | OWLObjectIntersectionOf | 20  | <b>0.607</b> | 98.498   | <b>0.607</b> | 0.254 | <b>0.607</b> | 5.210   | <b>0.607</b> | 0.237 | 0.557        | 5.892 |
|          | OWLObjectUnionOf        | 20  | <b>0.173</b> | 1.040    | <b>0.173</b> | 0.276 | <b>0.173</b> | 5.289   | <b>0.173</b> | 0.259 | 0.123        | 4.437 |
| 80       | OWLClass                | 15  | 0.195        | 0.168    | 0.195        | 0.081 | 0.195        | 1.208   | 0.195        | 0.079 | 0.195        | 2.166 |
|          | OWLObjectComplementOf   | 15  | 0.047        | 4.810    | 0.047        | 0.087 | 0.047        | 1.332   | 0.047        | 0.085 | <b>0.050</b> | 3.097 |
|          | OWLObjectIntersectionOf | 180 | 0.424        | 14.618   | 0.424        | 0.093 | 0.424        | 1.246   | 0.424        | 0.086 | <b>0.427</b> | 4.724 |
|          | OWLObjectUnionOf        | 180 | 0.076        | 4.428    | 0.076        | 0.103 | 0.076        | 1.227   | 0.076        | 0.102 | <b>0.077</b> | 5.488 |
| 90       | OWLClass                | 5   | 0.000        | 0.121    | 0.000        | 0.060 | 0.000        | 0.353   | 0.000        | 0.060 | 0.000        | 0.472 |
|          | OWLObjectComplementOf   | 5   | 0.019        | 1.351    | 0.019        | 0.109 | 0.019        | 0.402   | 0.019        | 0.043 | <b>0.022</b> | 0.471 |
|          | OWLObjectIntersectionOf | 20  | 0.505        | 3.360    | 0.505        | 0.077 | 0.505        | 0.322   | 0.505        | 0.081 | <b>0.506</b> | 8.151 |
|          | OWLObjectUnionOf        | 20  | 0.016        | 0.536    | 0.016        | 0.083 | 0.016        | 0.362   | 0.016        | 0.054 | <b>0.017</b> | 0.981 |

Table 8: Retrieval performance on the *Family* dataset with different levels of **noises**. # represents the number of expression types generated, **Jac** and **RT** represent the average Jaccard similarity and average runtime in seconds on every concept type

| Ratio(%) | Concept Type            | #    | HermiT       |       | Pellet       |       | JFact        |       | OpenIlet     |       | EBR          |       |
|----------|-------------------------|------|--------------|-------|--------------|-------|--------------|-------|--------------|-------|--------------|-------|
|          |                         |      | Jac          | RT    |
| 0        | OWLClass                | 18   | 1.000        | 0.013 | 1.000        | 0.018 | 1.000        | 0.023 | 1.000        | 0.011 | 1.000        | 0.008 |
|          | OWLObjectAllValuesFrom  | 288  | 0.000        | 0.408 | 0.000        | 0.013 | 0.000        | 0.021 | 0.000        | 0.013 | <b>1.000</b> | 0.151 |
|          | OWLObjectComplementOf   | 18   | 0.056        | 0.403 | 0.056        | 0.014 | 0.056        | 0.018 | 0.056        | 0.010 | <b>1.000</b> | 0.006 |
|          | OWLObjectIntersectionOf | 1296 | 0.387        | 0.231 | 0.387        | 0.014 | 0.387        | 0.021 | 0.387        | 0.013 | <b>1.000</b> | 0.013 |
|          | OWLObjectMaxCardinality | 864  | 0.000        | 0.409 | 0.000        | 0.013 | 0.000        | 0.022 | 0.000        | 0.012 | <b>1.000</b> | 0.079 |
|          | OWLObjectMinCardinality | 864  | 0.565        | 0.438 | 0.565        | 0.025 | 0.565        | 0.024 | 0.565        | 0.025 | <b>1.000</b> | 0.079 |
|          | OWLObjectSomeValuesFrom | 288  | 0.556        | 0.418 | 0.556        | 0.012 | 0.556        | 0.025 | 0.556        | 0.013 | <b>1.000</b> | 0.078 |
|          | OWLObjectUnionOf        | 1296 | 0.521        | 0.318 | 0.521        | 0.014 | 0.521        | 0.023 | 0.521        | 0.014 | <b>1.000</b> | 0.013 |
| 10       | OWLClass                | 18   | 0.879        | 0.004 | 0.879        | 0.002 | 0.879        | 0.010 | 0.879        | 0.002 | 0.879        | 0.008 |
|          | OWLObjectAllValuesFrom  | 288  | 0.000        | 0.399 | 0.000        | 0.001 | 0.000        | 0.010 | 0.000        | 0.001 | <b>0.906</b> | 0.244 |
|          | OWLObjectComplementOf   | 18   | 0.056        | 0.395 | 0.056        | 0.003 | 0.056        | 0.014 | 0.056        | 0.004 | <b>0.918</b> | 0.010 |
|          | OWLObjectIntersectionOf | 1296 | 0.298        | 0.218 | 0.298        | 0.001 | 0.298        | 0.011 | 0.298        | 0.001 | <b>0.795</b> | 0.021 |
|          | OWLObjectMaxCardinality | 864  | 0.000        | 0.400 | 0.000        | 0.001 | 0.000        | 0.010 | 0.000        | 0.001 | <b>0.986</b> | 0.124 |
|          | OWLObjectMinCardinality | 864  | 0.536        | 0.425 | 0.536        | 0.010 | 0.536        | 0.011 | 0.536        | 0.011 | <b>0.671</b> | 0.124 |
|          | OWLObjectSomeValuesFrom | 288  | 0.469        | 0.405 | 0.469        | 0.002 | 0.469        | 0.012 | 0.469        | 0.002 | <b>0.817</b> | 0.124 |
|          | OWLObjectUnionOf        | 1296 | 0.501        | 0.306 | 0.501        | 0.002 | 0.501        | 0.011 | 0.501        | 0.002 | <b>0.934</b> | 0.020 |
| 20       | OWLClass                | 18   | 0.780        | 0.005 | 0.780        | 0.002 | 0.780        | 0.007 | 0.780        | 0.002 | 0.780        | 0.006 |
|          | OWLObjectAllValuesFrom  | 288  | 0.000        | 0.496 | 0.000        | 0.001 | 0.000        | 0.013 | 0.000        | 0.001 | <b>0.817</b> | 0.197 |
|          | OWLObjectComplementOf   | 18   | 0.056        | 0.495 | 0.056        | 0.001 | 0.056        | 0.009 | 0.056        | 0.001 | <b>0.840</b> | 0.007 |
|          | OWLObjectIntersectionOf | 1296 | 0.268        | 0.272 | 0.268        | 0.001 | 0.268        | 0.011 | 0.268        | 0.001 | <b>0.680</b> | 0.017 |
|          | OWLObjectMaxCardinality | 864  | 0.000        | 0.499 | 0.000        | 0.001 | 0.000        | 0.010 | 0.000        | 0.001 | <b>0.973</b> | 0.109 |
|          | OWLObjectMinCardinality | 864  | 0.514        | 0.536 | 0.514        | 0.012 | 0.514        | 0.012 | 0.514        | 0.013 | <b>0.538</b> | 0.111 |
|          | OWLObjectSomeValuesFrom | 288  | 0.404        | 0.511 | 0.404        | 0.002 | 0.404        | 0.012 | 0.404        | 0.003 | <b>0.699</b> | 0.111 |
|          | OWLObjectUnionOf        | 1296 | 0.489        | 0.381 | 0.489        | 0.002 | 0.489        | 0.012 | 0.489        | 0.002 | <b>0.878</b> | 0.018 |
| 40       | OWLClass                | 18   | 0.660        | 0.007 | 0.660        | 0.002 | 0.660        | 0.019 | 0.660        | 0.002 | 0.660        | 0.006 |
|          | OWLObjectAllValuesFrom  | 288  | 0.000        | 0.667 | 0.000        | 0.001 | 0.000        | 0.013 | 0.000        | 0.001 | <b>0.683</b> | 0.132 |
|          | OWLObjectComplementOf   | 18   | 0.056        | 0.663 | 0.056        | 0.001 | 0.056        | 0.013 | 0.056        | 0.004 | <b>0.717</b> | 0.006 |
|          | OWLObjectIntersectionOf | 1296 | 0.240        | 0.364 | 0.240        | 0.002 | 0.240        | 0.013 | 0.240        | 0.002 | <b>0.545</b> | 0.012 |
|          | OWLObjectMaxCardinality | 864  | 0.000        | 0.999 | 0.000        | 0.001 | 0.000        | 0.012 | 0.000        | 0.002 | <b>0.946</b> | 0.070 |
|          | OWLObjectMinCardinality | 864  | <b>0.489</b> | 0.725 | <b>0.489</b> | 0.015 | <b>0.489</b> | 0.013 | <b>0.489</b> | 0.015 | 0.397        | 0.070 |
|          | OWLObjectSomeValuesFrom | 288  | 0.328        | 0.682 | 0.328        | 0.002 | 0.328        | 0.013 | 0.328        | 0.002 | <b>0.567</b> | 0.071 |
|          | OWLObjectUnionOf        | 1296 | 0.478        | 0.510 | 0.478        | 0.002 | 0.478        | 0.013 | 0.478        | 0.002 | <b>0.802</b> | 0.012 |
| 80       | OWLClass                | 18   | 0.532        | 0.006 | 0.532        | 0.002 | 0.532        | 0.020 | 0.532        | 0.002 | 0.532        | 0.007 |
|          | OWLObjectAllValuesFrom  | 288  | 0.000        | 1.172 | 0.000        | 0.001 | 0.000        | 0.015 | 0.000        | 0.001 | <b>0.500</b> | 0.165 |
|          | OWLObjectComplementOf   | 18   | 0.056        | 1.167 | 0.056        | 0.001 | 0.056        | 0.017 | 0.056        | 0.001 | <b>0.541</b> | 0.007 |
|          | OWLObjectIntersectionOf | 1296 | 0.212        | 0.636 | 0.212        | 0.002 | 0.212        | 0.016 | 0.212        | 0.002 | <b>0.399</b> | 0.016 |
|          | OWLObjectMaxCardinality | 864  | 0.000        | 1.176 | 0.000        | 0.001 | 0.000        | 0.015 | 0.000        | 0.002 | <b>0.884</b> | 0.088 |
|          | OWLObjectMinCardinality | 864  | <b>0.466</b> | 1.276 | <b>0.466</b> | 0.021 | <b>0.466</b> | 0.019 | <b>0.466</b> | 0.020 | 0.293        | 0.090 |
|          | OWLObjectSomeValuesFrom | 288  | 0.259        | 1.190 | 0.259        | 0.003 | 0.259        | 0.017 | 0.259        | 0.003 | <b>0.438</b> | 0.090 |
|          | OWLObjectUnionOf        | 1296 | 0.478        | 0.888 | 0.478        | 0.002 | 0.478        | 0.017 | 0.478        | 0.003 | <b>0.711</b> | 0.015 |

Table 9: Retrieval performance on the *Father* dataset with different levels of **noises**. # represents the number of expression types generated, **Jac** and **RT** represent the average Jaccard similarity and average runtime in seconds on every concept type.

| Ratio(%) | Concept Type            | #   | HermiT |       | Pellet |       | JFact |       | Openllet |       | EBR   |       |
|----------|-------------------------|-----|--------|-------|--------|-------|-------|-------|----------|-------|-------|-------|
|          |                         |     | Jac    | RT    | Jac    | RT    | Jac   | RT    | Jac      | RT    | Jac   | RT    |
| 0        | OWLClass                | 3   | 1.000  | 0.003 | 1.000  | 0.003 | 1.000 | 0.003 | 1.000    | 0.003 | 1.000 | 0.001 |
|          | OWLObjectAllValuesFrom  | 12  | 0.167  | 0.008 | 0.167  | 0.002 | 0.167 | 0.003 | 0.167    | 0.007 | 1.000 | 0.002 |
|          | OWLObjectComplementOf   | 3   | 1.000  | 0.019 | 1.000  | 0.002 | 1.000 | 0.003 | 1.000    | 0.002 | 1.000 | 0.001 |
|          | OWLObjectIntersectionOf | 36  | 1.000  | 0.032 | 0.889  | 0.006 | 1.000 | 0.005 | 0.889    | 0.003 | 1.000 | 0.001 |
|          | OWLObjectMaxCardinality | 36  | 0.167  | 0.007 | 0.167  | 0.003 | 0.167 | 0.006 | 0.167    | 0.003 | 1.000 | 0.001 |
|          | OWLObjectMinCardinality | 36  | 1.000  | 0.007 | 1.000  | 0.002 | 1.000 | 0.003 | 1.000    | 0.002 | 1.000 | 0.001 |
|          | OWLObjectSomeValuesFrom | 12  | 1.000  | 0.008 | 1.000  | 0.003 | 1.000 | 0.003 | 1.000    | 0.002 | 1.000 | 0.001 |
|          | OWLObjectUnionOf        | 36  | 1.000  | 0.004 | 1.000  | 0.004 | 1.000 | 0.004 | 1.000    | 0.006 | 1.000 | 0.001 |
| 10       | OWLClass                | 9   | -      | -     | -      | -     | -     | -     | -        | -     | 0.852 | 0.001 |
|          | OWLObjectAllValuesFrom  | 36  | -      | -     | -      | -     | -     | -     | -        | -     | 0.781 | 0.002 |
|          | OWLObjectComplementOf   | 9   | -      | -     | -      | -     | -     | -     | -        | -     | 0.861 | 0.001 |
|          | OWLObjectIntersectionOf | 108 | -      | -     | -      | -     | -     | -     | -        | -     | 0.850 | 0.002 |
|          | OWLObjectMaxCardinality | 108 | -      | -     | -      | -     | -     | -     | -        | -     | 0.963 | 0.002 |
|          | OWLObjectMinCardinality | 108 | -      | -     | -      | -     | -     | -     | -        | -     | 0.749 | 0.002 |
|          | OWLObjectSomeValuesFrom | 36  | -      | -     | -      | -     | -     | -     | -        | -     | 0.711 | 0.002 |
|          | OWLObjectUnionOf        | 108 | -      | -     | -      | -     | -     | -     | -        | -     | 0.888 | 0.002 |
| 20       | OWLClass                | 9   | -      | -     | -      | -     | -     | -     | -        | -     | 0.744 | 0.001 |
|          | OWLObjectAllValuesFrom  | 36  | -      | -     | -      | -     | -     | -     | -        | -     | 0.647 | 0.002 |
|          | OWLObjectComplementOf   | 9   | -      | -     | -      | -     | -     | -     | -        | -     | 0.583 | 0.001 |
|          | OWLObjectIntersectionOf | 108 | -      | -     | -      | -     | -     | -     | -        | -     | 0.707 | 0.002 |
|          | OWLObjectMaxCardinality | 108 | -      | -     | -      | -     | -     | -     | -        | -     | 0.887 | 0.002 |
|          | OWLObjectMinCardinality | 108 | -      | -     | -      | -     | -     | -     | -        | -     | 0.595 | 0.002 |
|          | OWLObjectSomeValuesFrom | 36  | -      | -     | -      | -     | -     | -     | -        | -     | 0.562 | 0.002 |
|          | OWLObjectUnionOf        | 108 | -      | -     | -      | -     | -     | -     | -        | -     | 0.752 | 0.002 |
| 40       | OWLClass                | 9   | -      | -     | -      | -     | -     | -     | -        | -     | 0.681 | 0.001 |
|          | OWLObjectAllValuesFrom  | 36  | -      | -     | -      | -     | -     | -     | -        | -     | 0.494 | 0.002 |
|          | OWLObjectComplementOf   | 9   | -      | -     | -      | -     | -     | -     | -        | -     | 0.389 | 0.001 |
|          | OWLObjectIntersectionOf | 108 | -      | -     | -      | -     | -     | -     | -        | -     | 0.610 | 0.002 |
|          | OWLObjectMaxCardinality | 108 | -      | -     | -      | -     | -     | -     | -        | -     | 0.686 | 0.002 |
|          | OWLObjectMinCardinality | 108 | -      | -     | -      | -     | -     | -     | -        | -     | 0.532 | 0.002 |
|          | OWLObjectSomeValuesFrom | 36  | -      | -     | -      | -     | -     | -     | -        | -     | 0.410 | 0.002 |
|          | OWLObjectUnionOf        | 108 | -      | -     | -      | -     | -     | -     | -        | -     | 0.662 | 0.002 |
| 80       | OWLClass                | 9   | -      | -     | -      | -     | -     | -     | -        | -     | 0.667 | 0.001 |
|          | OWLObjectAllValuesFrom  | 36  | -      | -     | -      | -     | -     | -     | -        | -     | 0.389 | 0.002 |
|          | OWLObjectComplementOf   | 9   | -      | -     | -      | -     | -     | -     | -        | -     | 0.333 | 0.001 |
|          | OWLObjectIntersectionOf | 108 | -      | -     | -      | -     | -     | -     | -        | -     | 0.583 | 0.002 |
|          | OWLObjectMaxCardinality | 108 | -      | -     | -      | -     | -     | -     | -        | -     | 0.565 | 0.002 |
|          | OWLObjectMinCardinality | 108 | -      | -     | -      | -     | -     | -     | -        | -     | 0.463 | 0.002 |
|          | OWLObjectSomeValuesFrom | 36  | -      | -     | -      | -     | -     | -     | -        | -     | 0.375 | 0.002 |
|          | OWLObjectUnionOf        | 108 | -      | -     | -      | -     | -     | -     | -        | -     | 0.639 | 0.002 |

Table 10: Retrieval performance on the *Semantic Bible* dataset with different levels of **noises**. # represents the number of expression types generated, **Jac** and **RT** represent the average Jaccard similarity and average runtime in seconds on every concept type.

| Ratio(%) | Concept Type            | #  | HermiT |        | Pellet |       | JFact |       | Openllet |       | EBR   |        |
|----------|-------------------------|----|--------|--------|--------|-------|-------|-------|----------|-------|-------|--------|
|          |                         |    | Jac    | RT     | Jac    | RT    | Jac   | RT    | Jac      | RT    | Jac   | RT     |
| 0        | OWLClass                | 5  | 1.000  | 0.105  | 1.000  | 0.079 | 1.000 | 0.232 | 1.000    | 0.066 | 1.000 | 0.920  |
|          | OWLObjectComplementOf   | 5  | 0.027  | 19.699 | 0.027  | 0.061 | 0.027 | 0.201 | 0.027    | 0.065 | 0.903 | 2.533  |
|          | OWLObjectIntersectionOf | 20 | 0.757  | 14.462 | 0.757  | 0.066 | 0.757 | 0.191 | 0.757    | 0.055 | 0.976 | 3.641  |
|          | OWLObjectUnionOf        | 20 | 0.757  | 5.095  | 0.757  | 0.089 | 0.757 | 0.211 | 0.757    | 0.082 | 0.928 | 1.774  |
| 10       | OWLClass                | 2  | -      | -      | -      | -     | -     | -     | -        | -     | 0.637 | 1.069  |
|          | OWLObjectComplementOf   | 2  | -      | -      | -      | -     | -     | -     | -        | -     | 0.854 | 1.023  |
|          | OWLObjectIntersectionOf | 8  | -      | -      | -      | -     | -     | -     | -        | -     | 0.873 | 2.210  |
|          | OWLObjectUnionOf        | 8  | -      | -      | -      | -     | -     | -     | -        | -     | 0.812 | 2.114  |
| 20       | OWLClass                | 2  | -      | -      | -      | -     | -     | -     | -        | -     | 0.205 | 7.519  |
|          | OWLObjectComplementOf   | 2  | -      | -      | -      | -     | -     | -     | -        | -     | 0.783 | 7.254  |
|          | OWLObjectIntersectionOf | 8  | -      | -      | -      | -     | -     | -     | -        | -     | 0.747 | 14.649 |
|          | OWLObjectUnionOf        | 8  | -      | -      | -      | -     | -     | -     | -        | -     | 0.692 | 14.387 |
